# Supplementary material for: Development of silica-supported frustrated Lewis pairs: highly active transition metal-free catalysts for the Z-selective reduction of alkynes
Source: Royal Society of Chemistry journal article supplement (doi:10.1039/c5cy01372k), 2015-10-08
Supplement: c5cy01372k1.pdf [file c5cy01372k1.pdf]

## Supporting Information

### Development of Silica Supported Frustrated Lewis Pairs: Highly Active Transition Metal-Free Catalysts for Z-Selective Reduction of Alkyne

Kai C. Szeto,<sup>a</sup> Wissam Sahyoun,<sup>a</sup> Nicolas Merle,<sup>a</sup> Jessica Llop Castelbou,<sup>a</sup> Nicolas Popoff,<sup>a</sup> Frédéric Lefebvre,<sup>a</sup> Jean Raynaud,<sup>a</sup> Cyril Godard,<sup>b</sup> Carmen Claver,<sup>b</sup> Laurent Delevoye,<sup>c</sup> Régis M. Gauvin,<sup>c</sup> and Mostafa Taoufik\*<sup>a</sup>

<sup>a</sup> C2P2, CNRS-UMR 5265, Université Lyon 1, ESCPE Lyon, 43 Boulevard du 11 Novembre 1918, 69626 Villeurbanne Cedex, France

<sup>b</sup> Department of Physical and Inorganic Chemistry, Universitat Rovira i Virgili, Marcel·li Domingo s/n, Campus Sescelades, 43007, Tarragona, Spain

<sup>c</sup> UCCS (CNRS-UMR 8181), Université Lille Nord de France, USTL, 59652 Villeneuve d'Ascq, France <sup>b</sup>

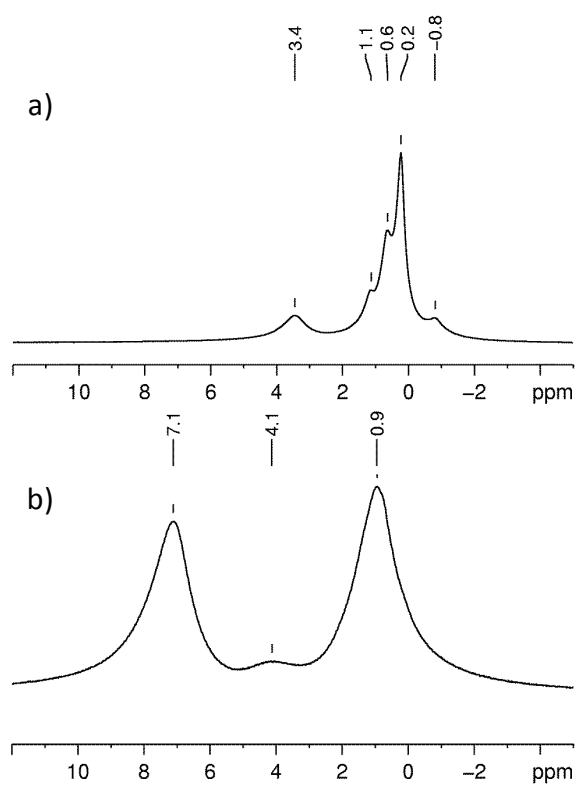

**Figure S1.**  $^1\text{H}$  MAS NMR (500 MHz, 8 scans, relaxation delay of 5 s, 10 kHz spinning speed) spectra of **1** (a) and **2** (b).

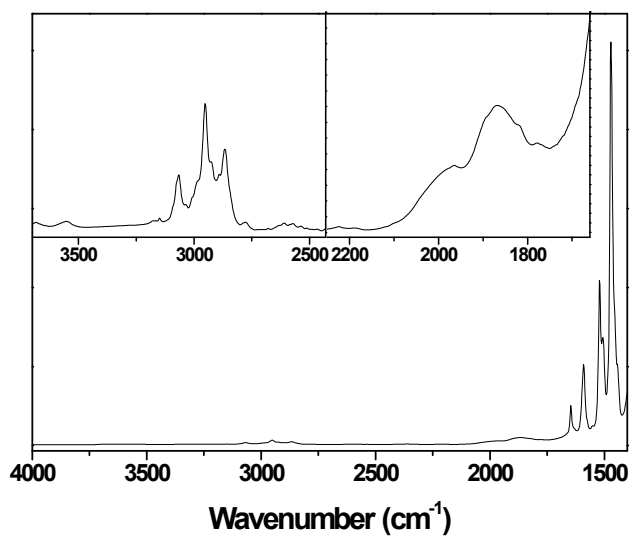

**Figure S2.** DRIFT spectrum of **3b**.

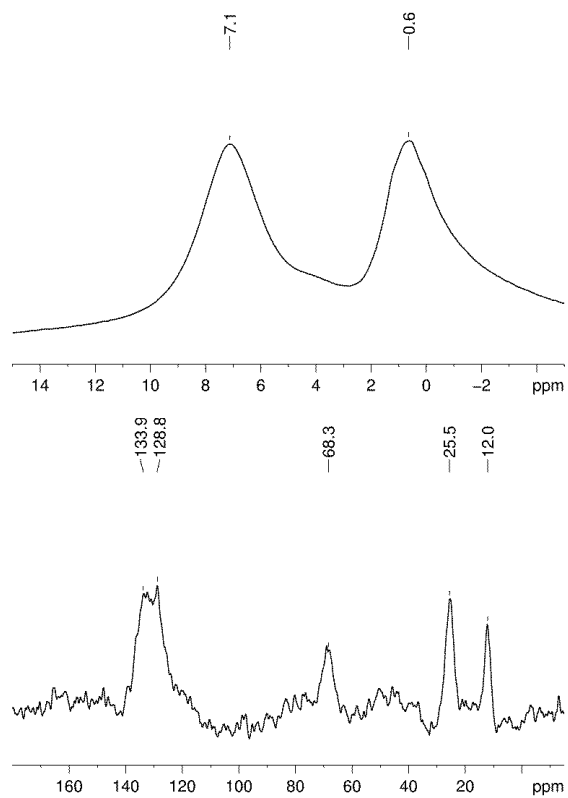

**Figure S3.**  $^1\text{H}$  MAS (500 MHz, 8 scans, relaxation delay of 5 s, 10 kHz spinning speed) and  $^{13}\text{C}$  CP/MAS (125.7 MHz, 30000 scans, relaxation delay of 5 s, 10 kHz spinning speed) NMR spectra of **3a**.

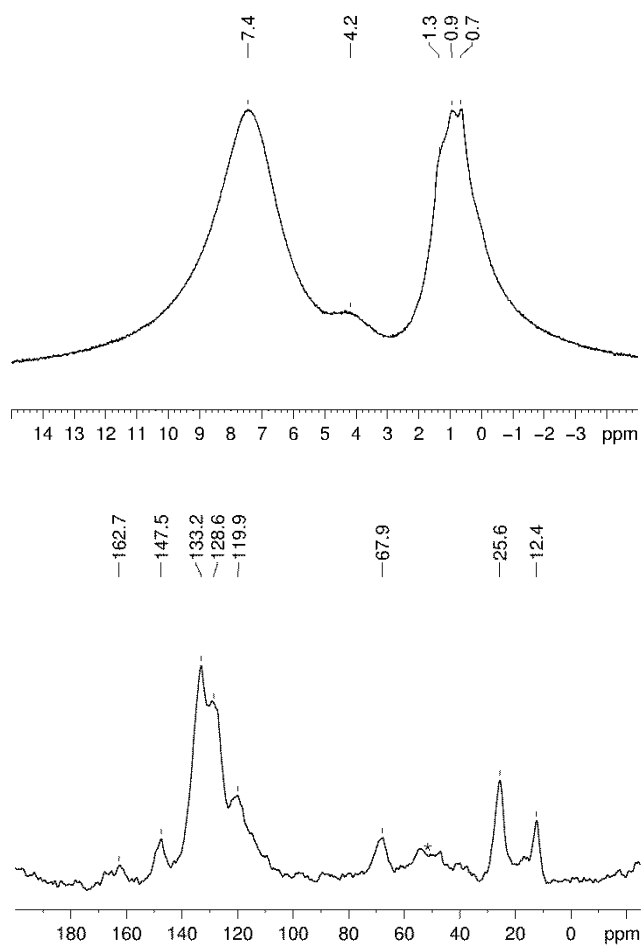

**Figure S4.**  $^1\text{H}$  MAS (500 MHz, 8 scans, relaxation delay of 5 s, 10 kHz spinning speed)  $^{13}\text{C}$  CPMAS NMR (125.7 MHz, 30000 scans, relaxation delay of 5 s, 10 kHz spinning speed) spectra of **3b**.

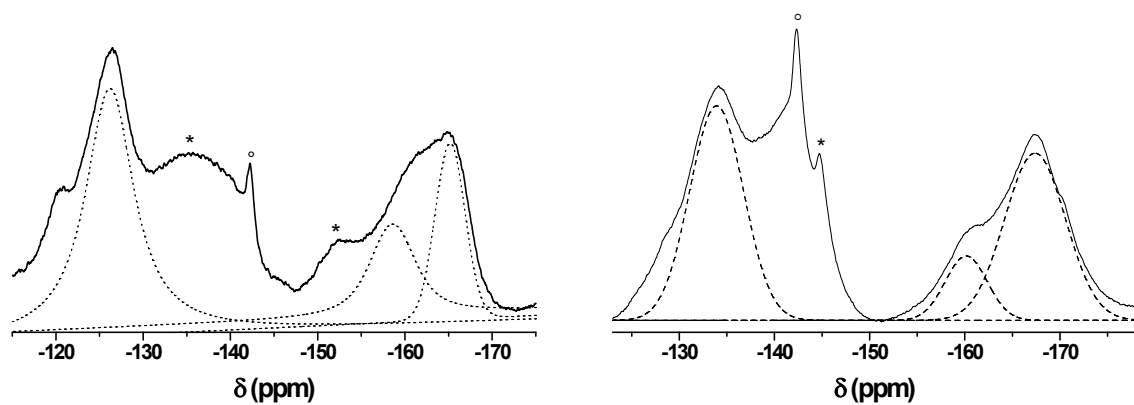

**Figure S5.**  $^{19}\text{F}$  MAS NMR (476.5 MHz, 64 scans, relaxation delay of 5 s, 12 kHz spinning speed) spectra of **3a** (left, dotted curves represent deconvoluted peaks) and **3b** (right, dashed curves present deconvoluted peaks), spinning side bands (\*) were determined by changing the spinning rate (7 kHz, 10 kHz), "o" corresponds to signal from Krytox<sup>®</sup> vacuum grease (DuPont).

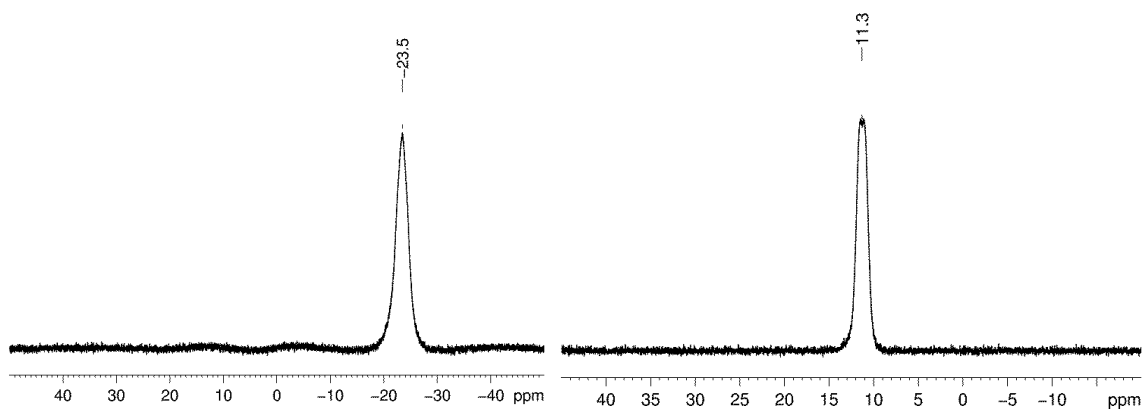

**Figure S6.**  $^{11}\text{B}$  NMR spectrum (left) and  $^{31}\text{P}$  NMR spectrum (right) of  $\text{PPh}_3\cdot\text{HB}(\text{C}_6\text{F}_5)_2$  in  $\text{C}_6\text{D}_6$ .

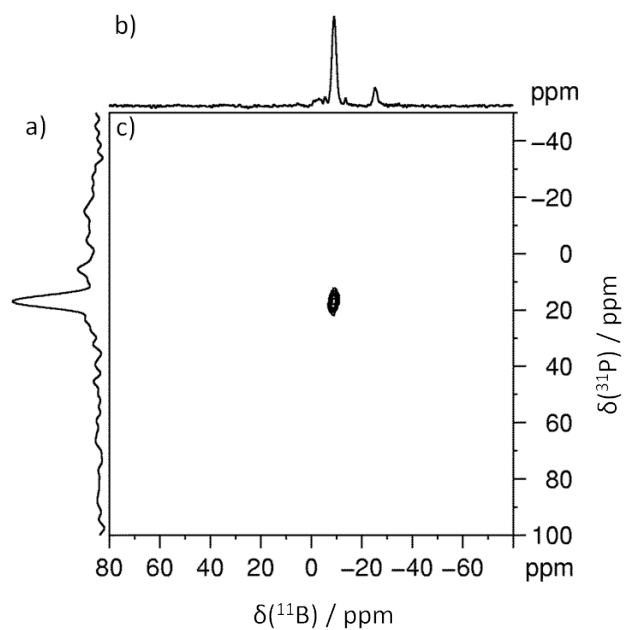

**Figure S7.** MAS-D-HMQC experiment of **3b** to a pair of nuclei  $\{^{11}\text{B}, ^{31}\text{P}\}$

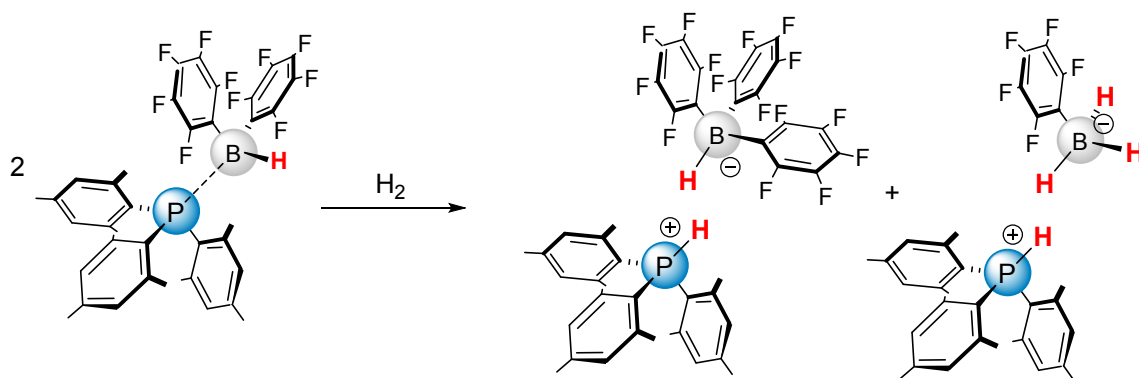

**Scheme S1.** Restructuration of  $[\text{HB}(\text{C}_6\text{F}_5)_2]\cdot[\text{PPh}_3]$  in solution after hydrogen addition.

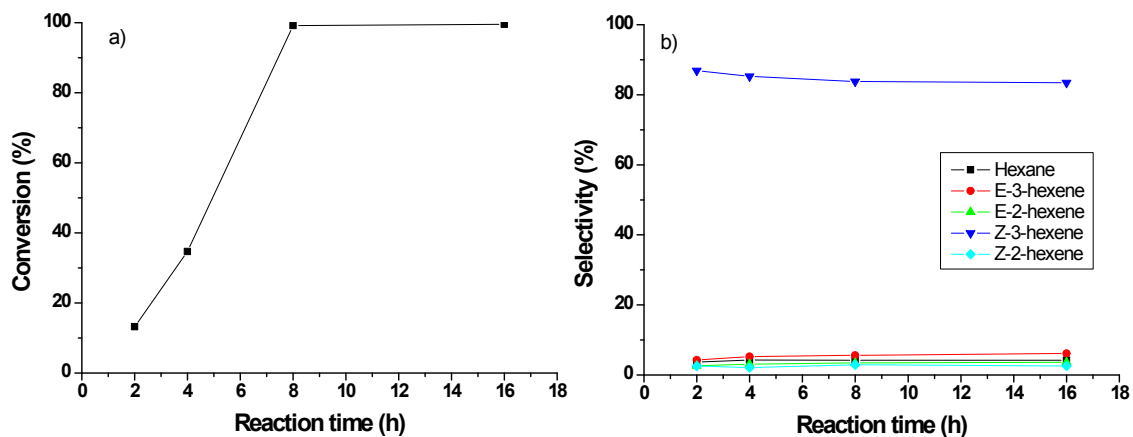

**Figure S8.** Kinetic study of the conversion of 3-hexyne at 10 bar hydrogen, 80 °C and 2 mol% of **3a** in pentane.

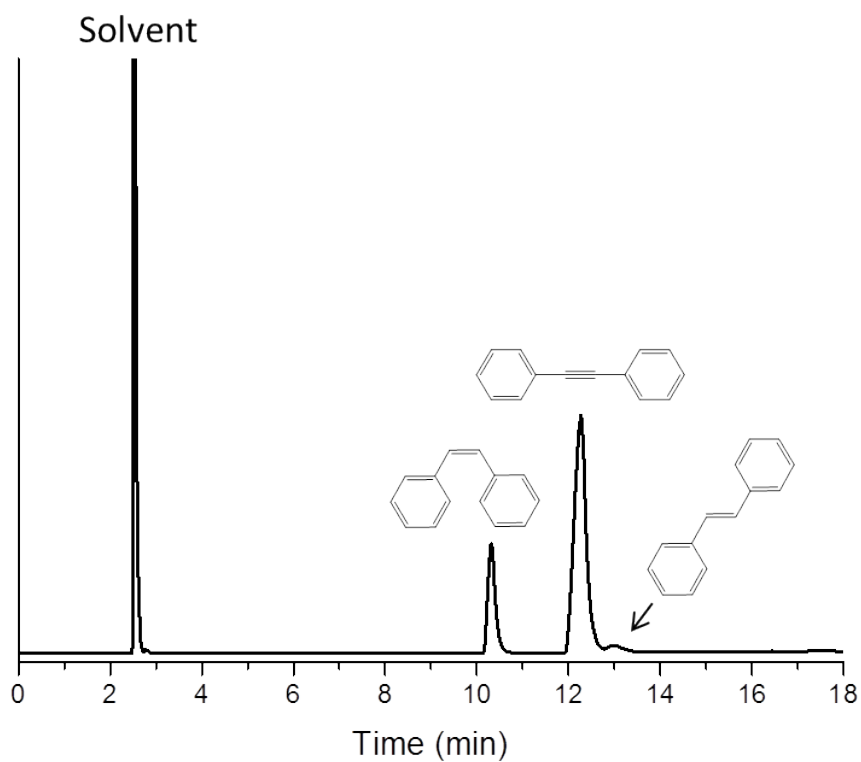

**Figure S9.** GC chromatogram of the hydrogenation of a) 1,2-diphenylethyne.

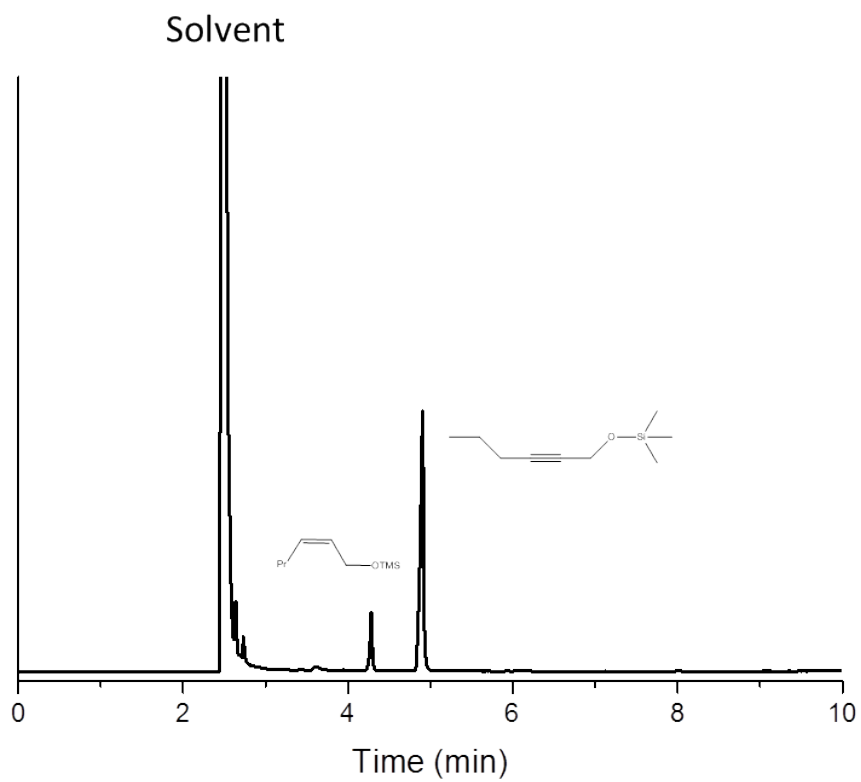

**Figure S10.** GC chromatogram of the hydrogenation of b) (hex-2-yn-1-yloxy)trimethylsilane.



Solvent

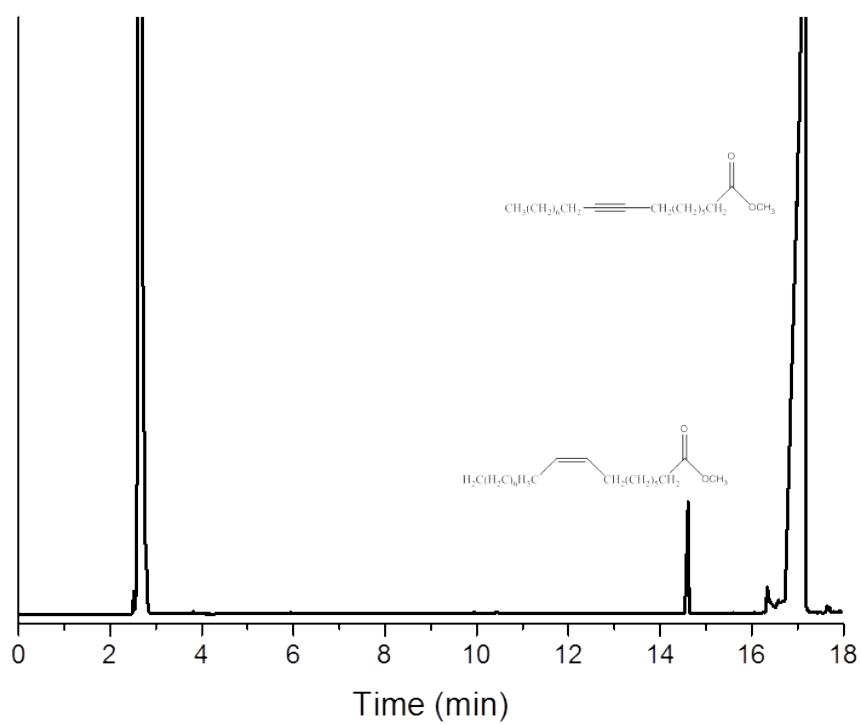

**Figure S11.** GC chromatogram of the hydrogenation of c) alkyne derived from oleic methyl ester: methyl octadec-9-ynoate..
